# Supplementary material
Source: Springer Nature journal article supplement (https://www.springermedizin.de/resource/supplementary/12906_2011_478_MOESM3_ESM.pdf/9519612)

**A**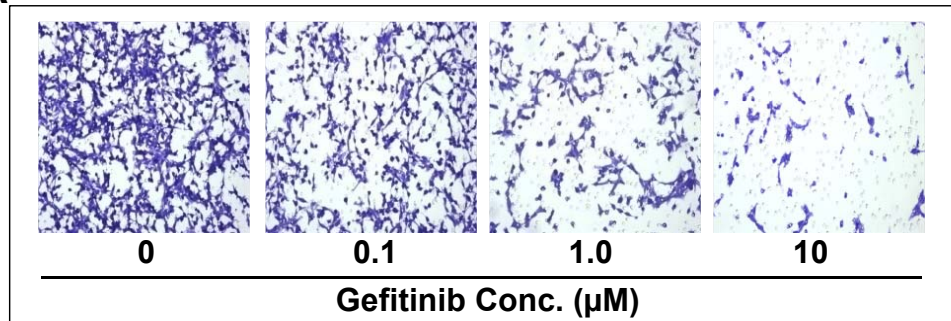**B**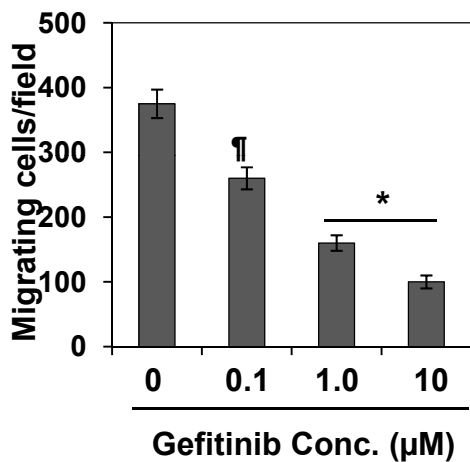**C**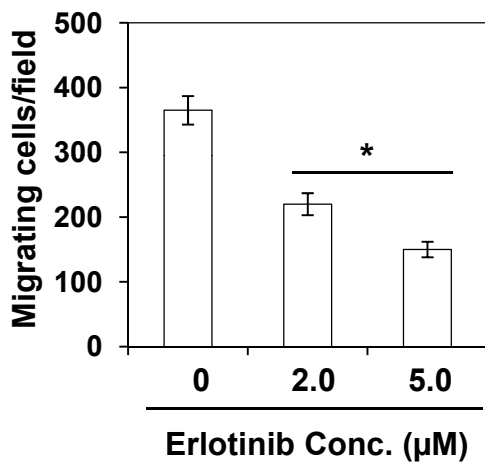**D**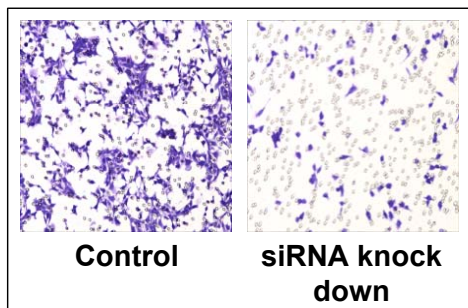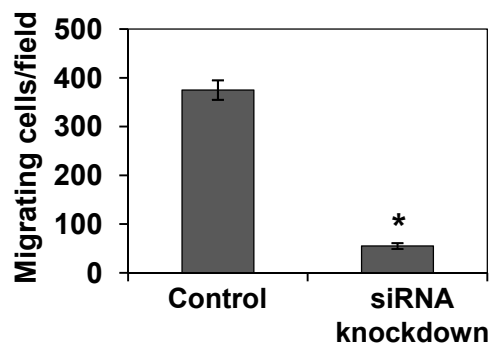**E**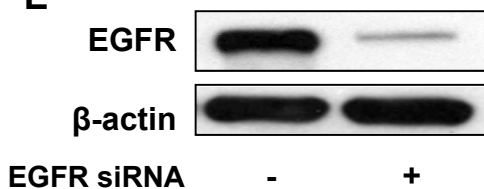

Supplement: MOESM3 [file 9519612]
